# Supplementary material
Source: PubMed Central journal article supplement (PMC3939721)
Supplement: NIHMS497495-supplement-01.pdf [file NIHMS497495-supplement-01.pdf]

**Supplemental Table. Heart failure hospitalization rate, by age and race-sex categories, per 100,000**

|                         | 2001 | 2002 | 2003 | 2004 | 2005 | 2006 | 2007 | 2008 | 2009 | relative change (2001-2009) | p-for-trend |
|-------------------------|------|------|------|------|------|------|------|------|------|-----------------------------|-------------|
| <b>Age 18 to &lt;45</b> |      |      |      |      |      |      |      |      |      |                             |             |
| White male              | 21   | 20   | 22   | 22   | 24   | 23   | 20   | 19   | 17   | -21.0%                      | 0.554       |
| White female            | 13   | 13   | 13   | 14   | 12   | 12   | 11   | 10   | 9    | -36.3%                      | 0.284       |
| Black male              | 174  | 199  | 188  | 239  | 201  | 228  | 227  | 198  | 169  | -2.7%                       | 0.702       |
| Black female            | 133  | 144  | 135  | 146  | 114  | 141  | 144  | 113  | 102  | -23.5%                      | 0.054       |
| <b>Age 45 to &lt;55</b> |      |      |      |      |      |      |      |      |      |                             |             |
| White male              | 151  | 149  | 139  | 152  | 157  | 154  | 139  | 122  | 124  | -17.6%                      | 0.083       |
| White female            | 100  | 101  | 95   | 90   | 85   | 77   | 72   | 69   | 62   | -37.3%                      | 0.003       |
| Black male              | 873  | 1015 | 936  | 1190 | 986  | 1219 | 1212 | 1016 | 906  | 3.7%                        | 0.024       |
| Black female            | 727  | 820  | 755  | 832  | 629  | 745  | 774  | 616  | 537  | -26.2%                      | <0.001      |
| <b>Age 55 to &lt;65</b> |      |      |      |      |      |      |      |      |      |                             |             |
| White male              | 505  | 464  | 458  | 486  | 486  | 416  | 382  | 353  | 334  | -33.9%                      | <0.001      |
| White female            | 377  | 332  | 315  | 320  | 293  | 256  | 243  | 218  | 191  | -49.3%                      | <0.001      |
| Black male              | 1791 | 1937 | 1907 | 2091 | 1721 | 1976 | 2019 | 1677 | 1394 | -22.2%                      | <0.001      |
| Black female            | 1624 | 1699 | 1597 | 1678 | 1265 | 1398 | 1421 | 1180 | 931  | -42.7%                      | <0.001      |

Age 65 to <75

|              |      |      |      |      |      |      |      |      |      |        |        |
|--------------|------|------|------|------|------|------|------|------|------|--------|--------|
| White male   | 1399 | 1333 | 1234 | 1285 | 1379 | 1187 | 1125 | 966  | 892  | -36.3% | <0.001 |
| White female | 1067 | 1005 | 913  | 967  | 929  | 818  | 741  | 650  | 582  | -45.5% | <0.001 |
| Black male   | 2981 | 3290 | 3012 | 3231 | 2660 | 3202 | 3060 | 2582 | 2263 | -24.1% | <0.001 |
| Black female | 3070 | 3335 | 2978 | 3032 | 2295 | 2767 | 2469 | 2189 | 1800 | -41.4% | <0.001 |

Age >=75

|              |      |      |      |      |      |      |      |      |      |        |        |
|--------------|------|------|------|------|------|------|------|------|------|--------|--------|
| White male   | 3886 | 3617 | 3331 | 3606 | 3823 | 3487 | 3287 | 3090 | 2877 | -26.0% | <0.001 |
| White female | 3359 | 3128 | 2913 | 3084 | 3270 | 2905 | 2727 | 2538 | 2380 | -29.1% | <0.001 |
| Black male   | 4816 | 4601 | 4517 | 5576 | 4042 | 4849 | 4614 | 3979 | 3382 | -29.8% | <0.001 |
| Black female | 5284 | 5282 | 4879 | 5380 | 4215 | 4781 | 4532 | 4047 | 3337 | -36.8% | <0.001 |
